echocardiography simulation is an efficient method to train anesthesiologists in basic transthoracic echocardiography skills. *Anesth Analg* 2012; 115:1042–51

7. Shanewise JS, Cheung AT, Aronson S, Stewart WJ, Weiss RL, Mark JB, Savage RM, Sears-Rogan P, Mathew JP, Quiñones MA, Cahalan MK, Savino JS: ASE/SCA guidelines for performing a comprehensive intraoperative multiplane transesophageal echocardiography examination: Recommendations of the American Society of Echocardiography Council for Intraoperative Echocardiography and the Society of Cardiovascular Anesthesiologists Task Force for Certification in Perioperative Transesophageal Echocardiography. *Anesth Analg* 1999; 89:870–84
8. McGraw KO, Wong SP: Forming inferences about some intraclass correlation coefficients. *Psychol Methods* 1996; 1:30–46
9. Mahmood F, Christie A, Matyal R: Transesophageal echocardiography and noncardiac surgery. *Semin Cardiothorac Vasc Anesth* 2008; 12:265–89
10. Schulmeyer MC, Santelices E, Vega R, Schmied S: Impact of intraoperative transesophageal echocardiography during noncardiac surgery. *J Cardiothorac Vasc Anesth* 2006; 20:768–71
11. Matyal R, Bose R, Warraich H, Shahul S, Ratcliff S, Panzica P, Mahmood F: Transthoracic echocardiographic simulator: Normal and the abnormal. *J Cardiothorac Vasc Anesth* 2011; 25:177–81
12. Niazi AU, Haldipur N, Prasad AG, Chan VW: Ultrasound-guided regional anesthesia performance in the early learning period: Effect of simulation training. *Reg Anesth Pain Med* 2012; 37:51–4
13. Castanelli DJ: The rise of simulation in technical skills teaching and the implications for training novices in anaesthesia. *Anaesth Intensive Care* 2009; 37:903–10
14. Sturm LP, Windsor JA, Cosman PH, Cregan P, Hewett PJ, Maddern GJ: A systematic review of skills transfer after surgical simulation training. *Ann Surg* 2008; 248:166–79
15. Frederiksen CA, Juhl-Olsen P, Nielsen DG, Eika B, Sloth E: Limited intervention improves technical skill in focus assessed transthoracic echocardiography among novice examiners. *BMC Med Educ* 2012; 12:65

## ANESTHESIOLOGY REFLECTIONS FROM THE WOOD LIBRARY-MUSEUM

### Professor Ralph Waters' Hickman Medal

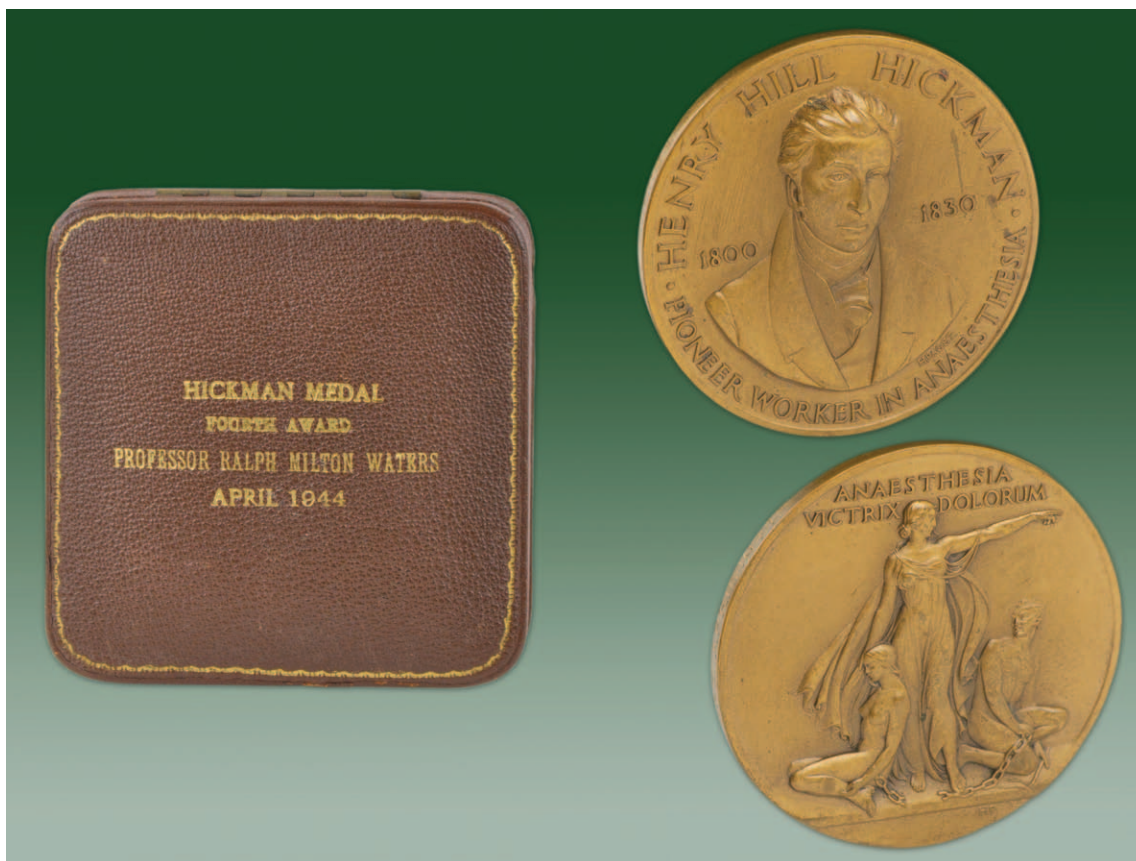

In London in April of 1944, the Royal Society of Medicine awarded its fourth Hickman Medal, to Professor Ralph M. Waters of the University of Wisconsin. Waters had founded one of the world's premiere academic departments of anesthesiology. His Hickman Medal features the visage of carbon dioxide's "suspended animation" pioneer, Henry Hill Hickman, on the obverse (*high right*) and the female form of "Anaesthesia, Victrix Dolorum" on the reverse. Ironically, Hickman was famous clinically for using carbon dioxide; Waters, for removing it. (Copyright © the American Society of Anesthesiologists, Inc.)

*George S. Bause, M.D., M.P.H., Honorary Curator, ASA's Wood Library-Museum of Anesthesiology, Park Ridge, Illinois, and Clinical Associate Professor, Case Western Reserve University, Cleveland, Ohio. UJYC@aol.com.*
